# Supplementary material for: Specialist pneumonia intervention nurse service improves pneumonia care and outcome
Source: HighWire-hosted journal article supplement (doi:10.1136/bmjresp-2020-000863), 2021-08-01
Supplement: bmjresp-2020-000863supp001_data_supplement.pdf [file bmjresp-2020-000863supp001_data_supplement.pdf]

Supplementary File 1: CAP checklist

| Patient details sticker                                                                                                                                                                                                            |                                                                                                                                                                                                                                           | 4hr Community Acquired Pneumonia Care Bundle                                                                                       |                          |
|------------------------------------------------------------------------------------------------------------------------------------------------------------------------------------------------------------------------------------|-------------------------------------------------------------------------------------------------------------------------------------------------------------------------------------------------------------------------------------------|------------------------------------------------------------------------------------------------------------------------------------|--------------------------|
|                                                                                                                                                                                                                                    |                                                                                                                                                                                                                                           | Date of admission:                                                                                                                 |                          |
|                                                                                                                                                                                                                                    |                                                                                                                                                                                                                                           | Time of admission:                                                                                                                 |                          |
| <b>B</b> reathlessness, cough and pyrexia                                                                                                                                                                                          | Symptoms suggestive of LRTI                                                                                                                                                                                                               | Yes <input type="checkbox"/><br>No <input type="checkbox"/>                                                                        |                          |
| <b>R</b> adiology reviewed                                                                                                                                                                                                         | New consolidation                                                                                                                                                                                                                         | Yes <input type="checkbox"/><br>No <input type="checkbox"/>                                                                        |                          |
| <b>E</b> WS                                                                                                                                                                                                                        | Use EWS escalation tool<br>Fluid if SBP < 90<br>Consider catheter                                                                                                                                                                         | EWS Score: <input type="text"/>                                                                                                    |                          |
| <b>A</b> ssess Severity CURB65                                                                                                                                                                                                     | Confusion <input type="checkbox"/><br>Urea >7 <input type="checkbox"/><br>RR > 30 <input type="checkbox"/><br>BP - SBP < 90 DBP <60 <input type="checkbox"/><br>65 age > 65 <input type="checkbox"/><br><b>Total</b> <input type="text"/> |                                                                                                                                    |                          |
| <b>T</b> reatment                                                                                                                                                                                                                  | Use UHL guidance (see diagram below)                                                                                                                                                                                                      |                                                                                                                                    | <input type="checkbox"/> |
| <b>H</b> ypoxia treated in 1st hour                                                                                                                                                                                                | Target sats: ≥94%<br>COPD 88-92%                                                                                                                                                                                                          |                                                                                                                                    | <input type="checkbox"/> |
| <b>E</b> xpert advice                                                                                                                                                                                                              | Bleep pneumonia nurse (2713)<br>Virtual respiratory clinic (mobile / ICM)                                                                                                                                                                 |                                                                                                                                    | <input type="checkbox"/> |
| <b>Score 0-1</b> <input type="checkbox"/>                                                                                                                                                                                          |                                                                                                                                                                                                                                           | <b>Score 2</b> <input type="checkbox"/>                                                                                            |                          |
| Amoxicillin 500 mg po tds 5/7<br>or<br><b>if Penicillin allergic:</b><br>Doxycycline 200 mg po od 5/7                                                                                                                              |                                                                                                                                                                                                                                           | Amoxicillin 1 g po tds 5/7<br>Doxycycline 200 mg po od 5/7<br>or<br><b>if Penicillin allergic:</b><br>Doxycycline 200 mg po od 5/7 |                          |
|                                                                                                                                                                                                                                    |                                                                                                                                                                                                                                           | <b>Score 3-5</b> <input type="checkbox"/>                                                                                          |                          |
| Coamoxiclav 1.2g tds IV 5/7<br>Doxycycline 200 mg po od 5/7<br>or<br><b>if Penicillin allergic:</b><br>Doxycycline 200 mg po od 5/7<br>IV meropenem 500mg tds 5/7<br><b>if anaphylaxis to penicillin discuss with microbiology</b> |                                                                                                                                                                                                                                           |                                                                                                                                    |                          |
| Time Antibiotics given:<br>(= bundle completion)                                                                                                                                                                                   | Name of Doctor:                                                                                                                                                                                                                           | Grade of Doctor:                                                                                                                   |                          |
