# Supplementary material for: Specialist pneumonia intervention nurse service improves pneumonia care and outcome
Source: HighWire-hosted journal article supplement (doi:10.1136/bmjresp-2020-000863), 2021-08-01
Supplement: bmjresp-2020-000863supp004_data_supplement.pdf [file bmjresp-2020-000863supp004_data_supplement.pdf]

**Supplementary File 4:** Differences between standardised stationary series for UHL CAP admissions and national CAP admissions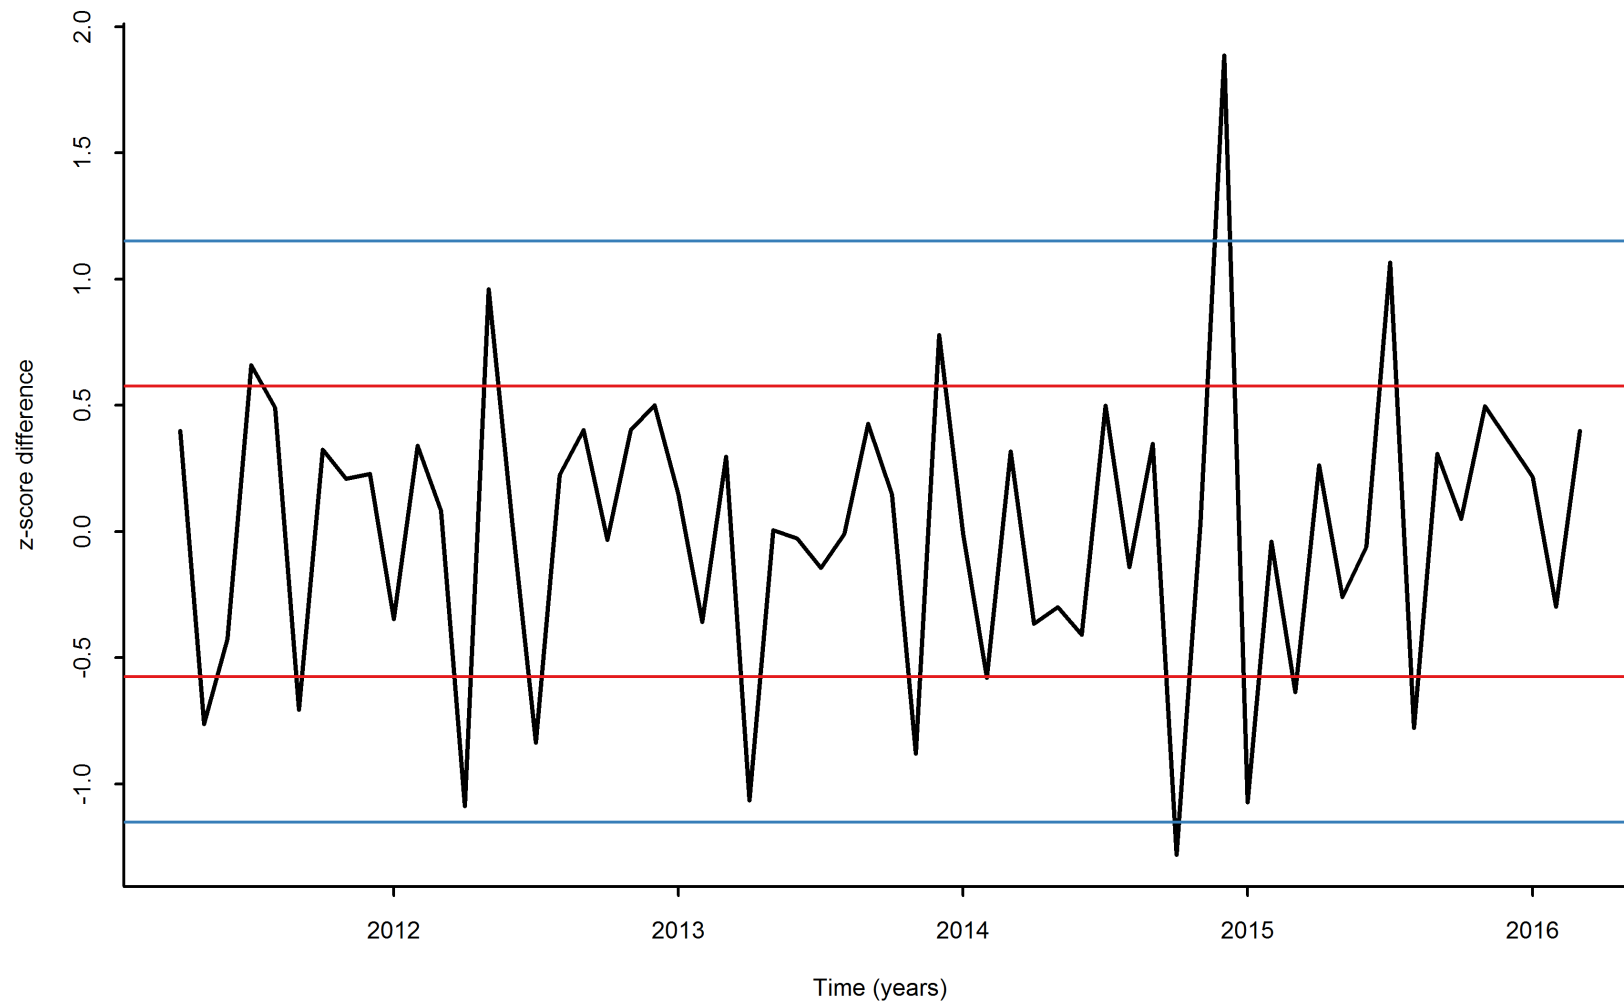

Aggregate monthly admission data was kindly supplied by Dr Foster.  
Blue and red lines indicate 1 and 2 standard deviations above the mean difference respectively.
